# Supplementary material for: CeO2 nanowires self-inserted into porous Co3O4 frameworks as high-performance “noble metal free” hetero-catalysts
Source: PubMed Central journal article supplement — Chem Sci. 2015 Oct 28;7(2):1109–14. doi: 10.1039/c5sc03430b (PMC5954975; doi:10.1039/c5sc03430b), 2015-10-28
Supplement: SC-007-C5SC03430B-s001.pdf [file SC-007-C5SC03430B-s001.pdf]

## Electronic Supplementary Information (ESI)

### **CeO<sub>2</sub> Nanowires Self-inserted Porous Co<sub>3</sub>O<sub>4</sub> Frameworks as High-performance “Noble Metal Free” Hetero-catalysts**

*Xiao Wang, Shuna Zhao, Yibo Zhang, Zhuo Wang, Jing Feng, Shuyan Song\* and Hongjie Zhang\**

State Key Laboratory of Rare Earth Resource Utilization, Changchun Institute of Applied Chemistry, Chinese Academy of Sciences, Changchun 130022, P. R. China.

E-mail: [songsy@ciac.ac.cn](mailto:songsy@ciac.ac.cn); [hongjie@ciac.ac.cn](mailto:hongjie@ciac.ac.cn)

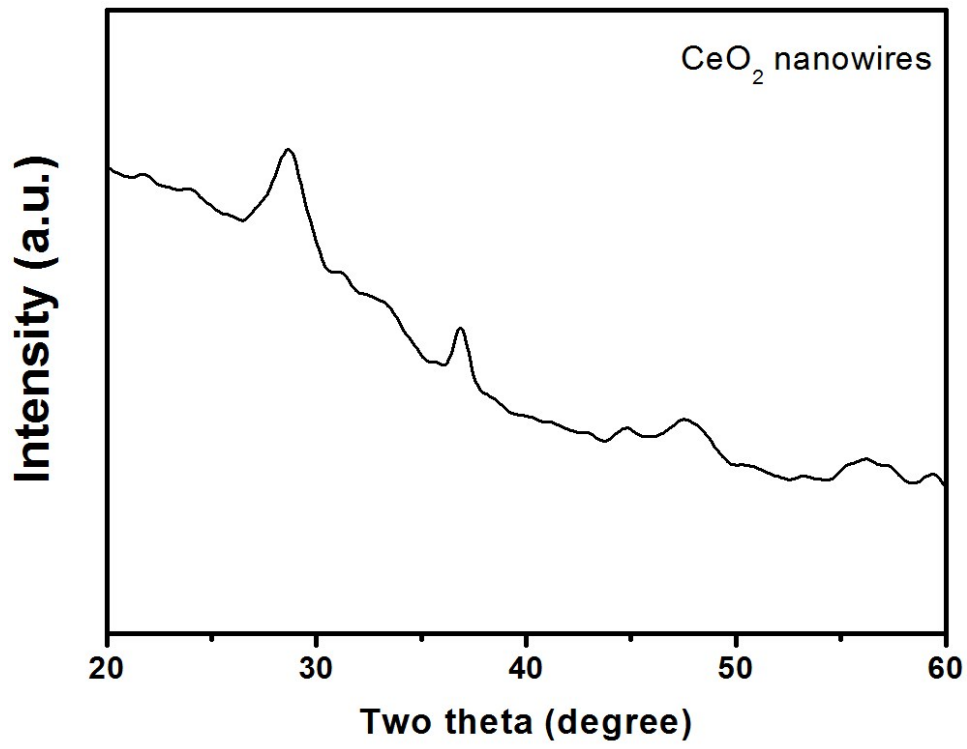

Fig. S1. XRD spectrum of pure CeO<sub>2</sub> nanowires.

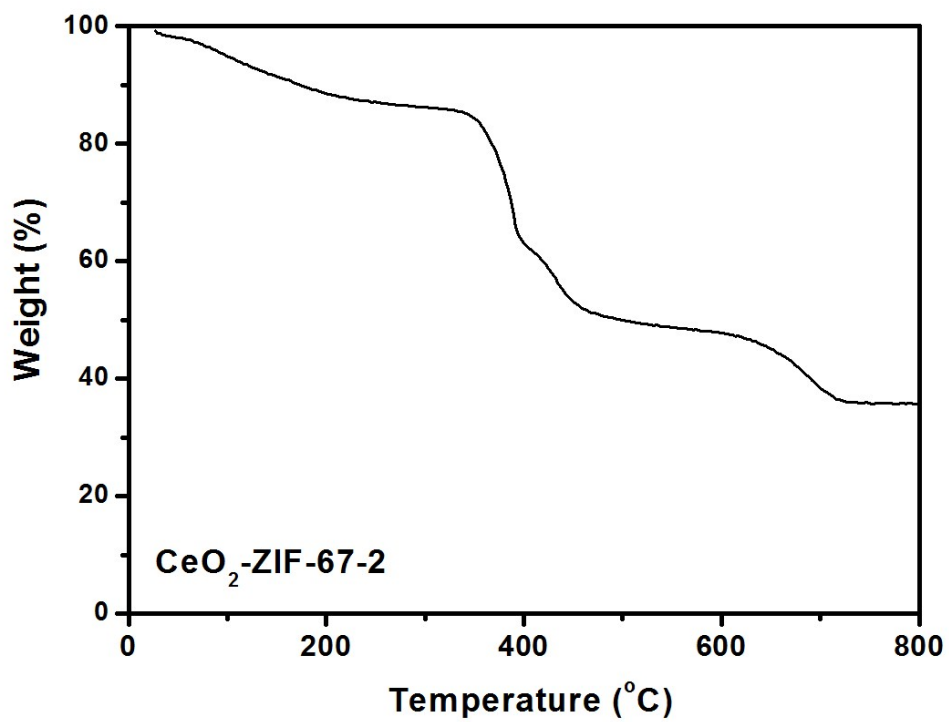

**Fig. S2.** TG curve of CeO<sub>2</sub>-ZIF-67-2 precursor.

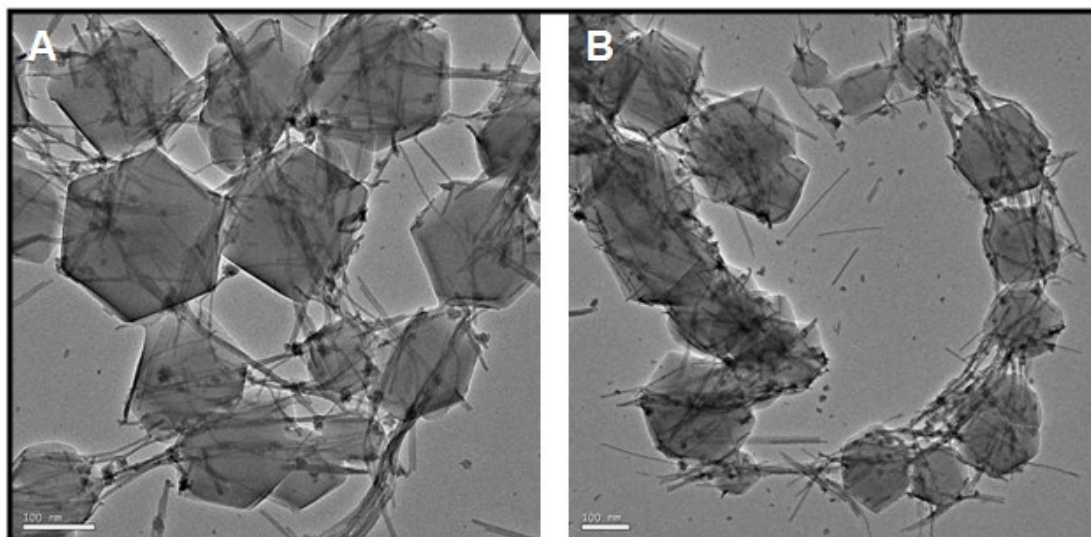

**Fig. S3.** TEM images of CeO<sub>2</sub>-ZIF-67-1 (A) and CeO<sub>2</sub>-ZIF-67-3 (B) precursors.

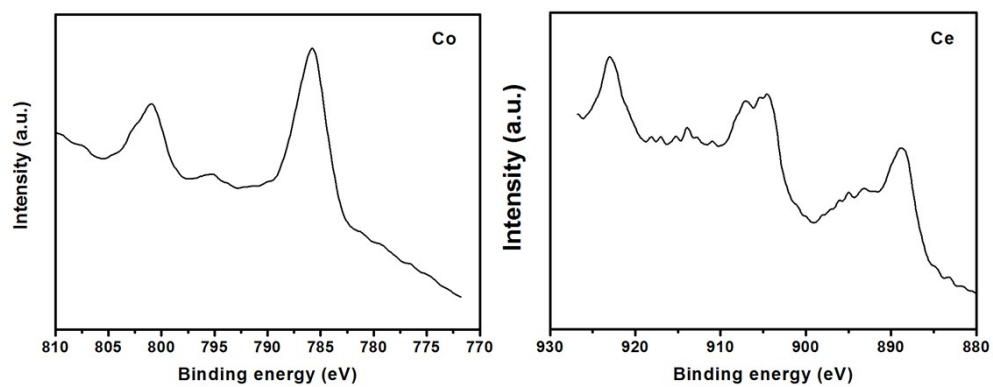

**Fig. S4.** XPS data of CeO<sub>2</sub>-Co<sub>3</sub>O<sub>4</sub>-2 sample.

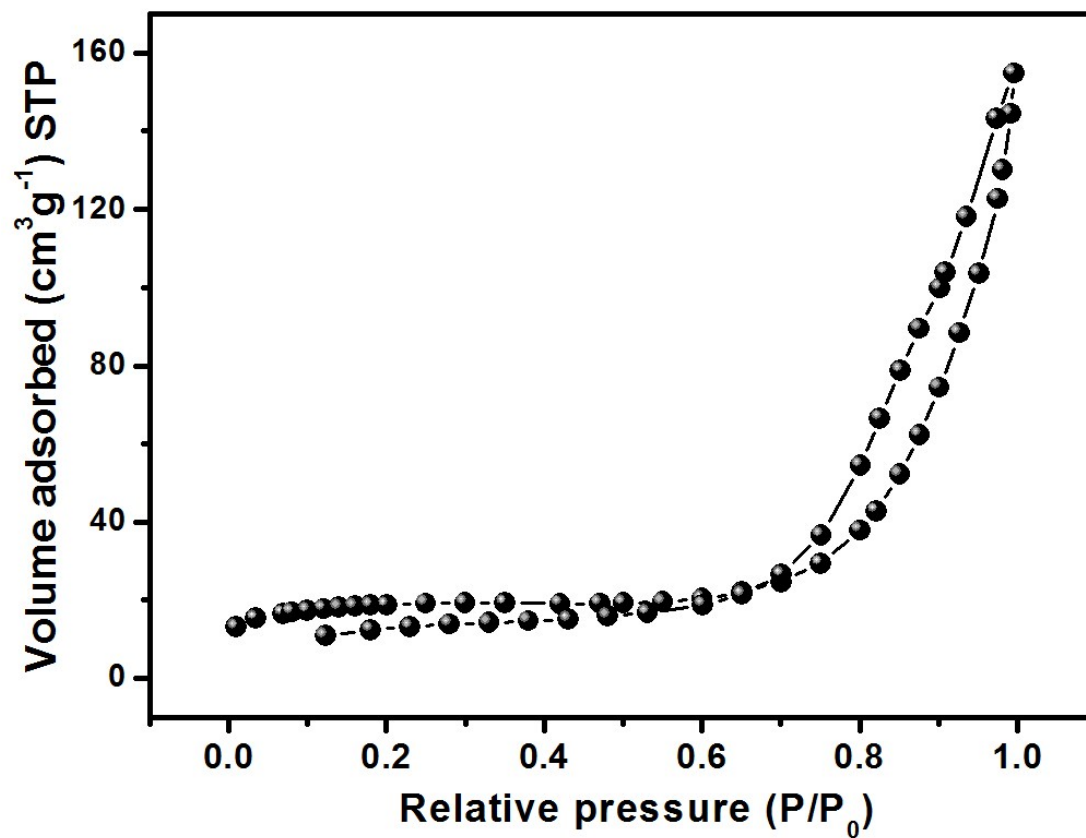

Fig. S5. N<sub>2</sub> adsorption-desorption isotherm of CeO<sub>2</sub>-Co<sub>3</sub>O<sub>4</sub>-2 sample.

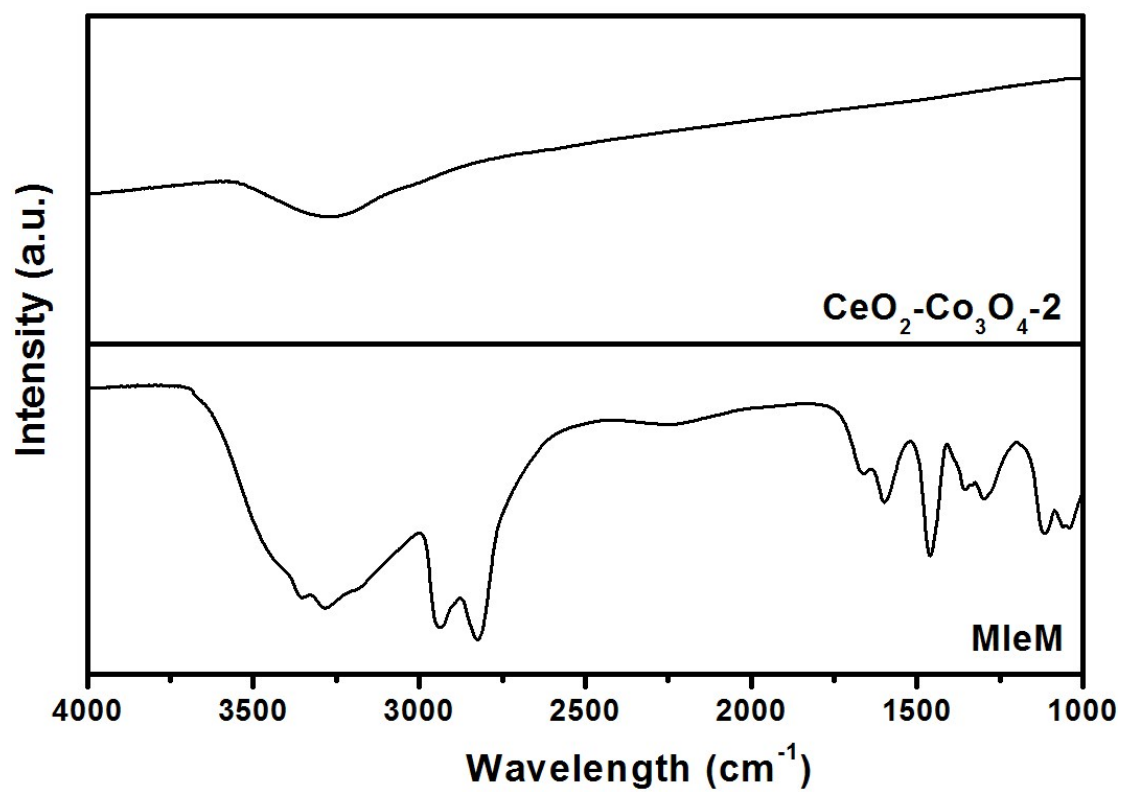

Fig. S6. IR spectra of MieM molecule and final CeO<sub>2</sub>-Co<sub>3</sub>O<sub>4</sub>-2 sample.

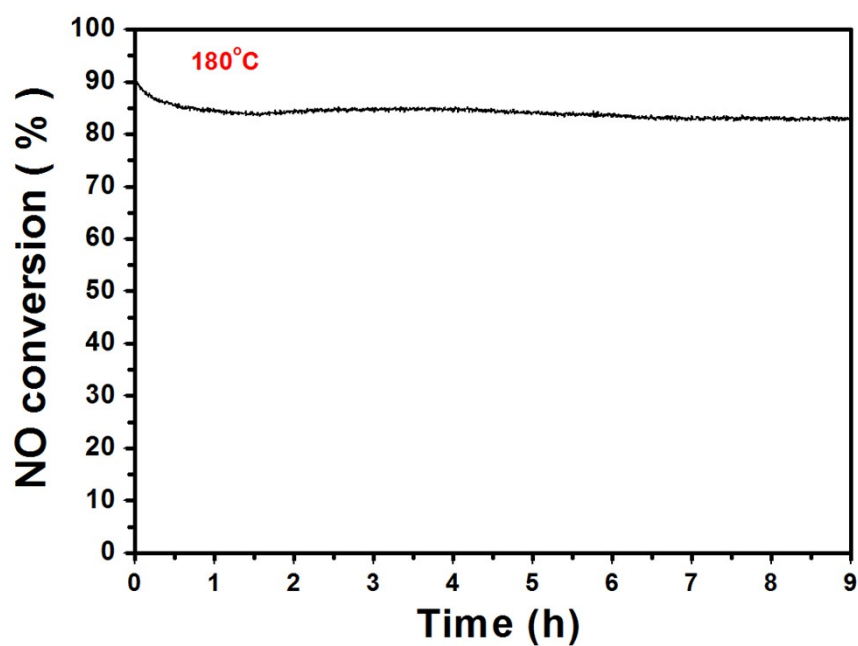

**Fig. S7.** NO conversion obtained by using CeO<sub>2</sub>-Co<sub>3</sub>O<sub>4</sub>-2 hybrid nanocatalyst at 180 °C for 9 hours.

|                                                    | CeO <sub>2</sub> -ZIF-67-1 | CeO <sub>2</sub> -ZIF-67-2 | CeO <sub>2</sub> -ZIF-67-3 |
|----------------------------------------------------|----------------------------|----------------------------|----------------------------|
| CeO <sub>2</sub> /Co <sub>3</sub> O <sub>4</sub> * | 8/35                       | 14/32                      | 17/22                      |

\*: the molar ratio of Ce/Co is calculated from the ICP results.

**Table S1.** The molar ratios of CeO<sub>2</sub>/Co<sub>3</sub>O<sub>4</sub> in final hybrids.
